## EXPRESSION OF CONCERN

# Expression of Concern: 2-aminoethoxydiphenyl borate provides an anti-oxidative effect and mediates cardioprotection during ischemia reperfusion in mice

The *PLOS ONE* Editors

The Funding Statement for this article [1] states that the study received funding from the Smoking Research Foundation, which according to [2] has received financial support from the tobacco industry. In light of this issue the *PLOS ONE* article [1] does not comply with the journal's policy on Funding from Tobacco Companies [3] which was implemented in 2010. Therefore, the *PLOS ONE* Editors issue this Expression of Concern.

We regret that this concern was not identified and addressed prior to the article's [1] publication.

## References

1. Morihara H, Obana M, Tanaka S, Kawakatsu I, Tsuchiyama D, Mori S, et al. (2017) 2-aminoethoxydiphenyl borate provides an anti-oxidative effect and mediates cardioprotection during ischemia reperfusion in mice. *PLoS ONE* 12(12): e0189948. <https://doi.org/10.1371/journal.pone.0189948> PMID: 29267336
2. Iida K, Proctor RN. (2018) 'The industry must be inconspicuous': Japan Tobacco's corruption of science and health policy via the Smoking Research Foundation. *Tobacco Control* 27:e3–e11. <https://doi.org/10.1136/tobaccocontrol-2017-053971> PMID: 29437992
3. <https://journals.plos.org/plosone/s/disclosure-of-funding-sources#loc-funding-from-tobacco-companies>

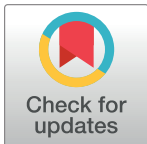

## OPEN ACCESS

**Citation:** The *PLOS ONE* Editors (2023) Expression of Concern: 2-aminoethoxydiphenyl borate provides an anti-oxidative effect and mediates cardioprotection during ischemia reperfusion in mice. *PLoS ONE* 18(1): e0280118. <https://doi.org/10.1371/journal.pone.0280118>

**Published:** January 11, 2023

**Copyright:** © 2023 The *PLOS ONE* Editors. This is an open access article distributed under the terms of the [Creative Commons Attribution License](https://creativecommons.org/licenses/by/4.0/), which permits unrestricted use, distribution, and reproduction in any medium, provided the original author and source are credited.
